# Supplementary material for: Quantitative Tracking Tumor Suppression Efficiency of Human Umbilical Cord-Derived Mesenchymal Stem Cells by Bioluminescence Imaging in Mice Hepatoma Model
Source: PubMed Central journal article supplement — Int J Stem Cells. 2019 Dec 31;13(1):104–15. doi: 10.15283/ijsc19098 (PMC7119203; doi:10.15283/ijsc19098), 2019-12-31
Supplement: IJSC-13-104_Supple.pdf [file IJSC-13-104_Supple.pdf]

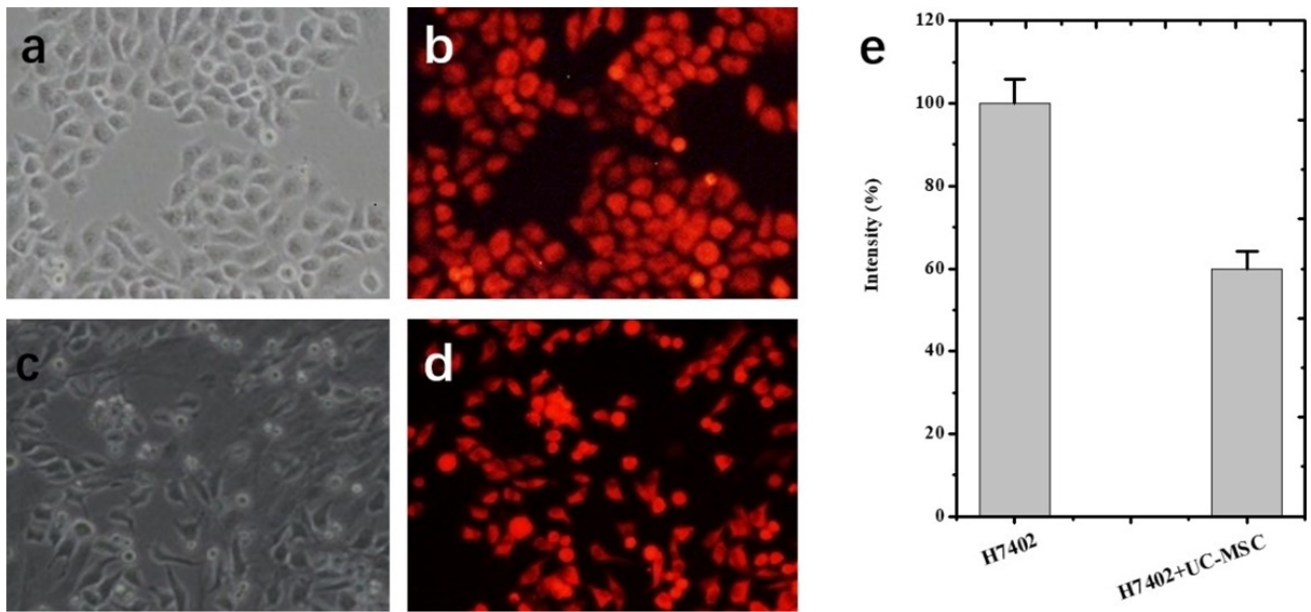

**Fig. S1.** Optical and fluorescent images of (a, b) H7402-CMV-Luc2-mKate2 cells were cultured in the presence of DMEM supplanted with 10% FBS for 4 days; (c, d) UC-MSCs induced apoptosis of H7402 cells in vitro co-culture H7402-CMV-Luc2-mKate2 with UC-MSCs under the same condition media. (e) Quantitative analysis of cell fluorescence intensity under field of view of H7402 and H7402+UC-MSCs.
